# Supplementary material for: The E-music box: an empirical method for exploring the universal capacity for musical production and for social interaction through music
Source: PubMed Central journal article supplement (PMC4680608; doi:10.1098/rsos.150286), 2015-11-18
Supplement: rsos150286supp1.pdf [file rsos150286supp1.pdf]

```

char R;
int val;
int encoderPinA = 3;
int encoderPinB = 2;
float encoderPos = 0;
int encoderPinALast = LOW;
int encoderPinBLast = LOW;
int n = LOW;
int m = LOW;

void setup() {
  pinMode (encoderPinA,INPUT);
  pinMode (encoderPinB,INPUT);
  Serial1.begin (9600);
}

void loop() {
  n = digitalRead(encoderPinA);
  if ((encoderPinALast == HIGH) && (n == LOW))
  {
    if (digitalRead(encoderPinB) == LOW)
    {
      encoderPos = encoderPos + 1 ;
    }
    else
    {
      encoderPos = encoderPos - 1;
    }
  }
  if(encoderPos > 224 )
  {
    encoderPos = 0;
  }
  if (encoderPos < 0)
  {
    encoderPos = 224;
  }

  Serial1.write(int(encoderPos));

}

```

```
encoderPinALast = n;
```

```
if (Serial1.available()>0)
{
  R = (char)Serial1.read();
  if (R == 'r' || R == 'R')
  {
    encoderPos = 0;
  }
}
```

```
if (Serial.available()>0)
{
  R = (char)Serial.read();
  if (R == 'r' || R == 'R')
  {
    encoderPos = 0;
  }
}
```

```
}
```
